# Supplementary material for: Secretogranin III as a disease-associated ligand for antiangiogenic therapy of diabetic retinopathy
Source: PubMed Central journal article supplement — J Exp Med. 2017 Apr 3;214(4):1029–47. doi: 10.1084/jem.20161802 (PMC5379984; doi:10.1084/jem.20161802), 2017-04-03
Supplement: JEM_20161802_sm.pdf [file JEM_20161802_sm.pdf]

## SUPPLEMENTAL MATERIAL

LeBlanc et al., <https://doi.org/10.1084/jem.20161802>**A Human VEGF<sub>1-110</sub> coding sequence with altered codons**

(65.8% identical human VEGF and 66.4% to mouse VEGF)

|               |                                                                            |     |
|---------------|----------------------------------------------------------------------------|-----|
| Human VEGF    | GCACCCATGGCAGAAGGAGGAGGGCAGAATCATCACGAAGTGGTGAAGTTCATGGATGTC               | 60  |
| Altered codon | GCTCCGATGGCTGAGGGTGGTGGCCAAAACCACCATGAGGTTGTCAAATTTATGGACGTG               | 60  |
|               | **:* ** ** **:* **:* **:* **:* **:* **:* **:* **:* **:* **:* **:* **:* **: |     |
| Human VEGF    | TATCAGCGCAGCTACTGCCATCCAATCGAGACCCTGGTGGACATCTTCCAGGAGTACCCT               | 120 |
| Altered codon | TACCAACGTTCTTATTGTCCACCTATTGAACTTTAGTTGATATTTTCAAGAATATCCA                 | 120 |
|               | ** **:* **:* **:* **:* **:* **:* **:* **:* **:* **:* **:* **:* **:* **:    |     |
| Human VEGF    | GATGAGATCGAGTACATCTTCAAGCCATCCTGTGTGCCCTGATGCGATGCGGGGGCTGC                | 180 |
| Altered codon | GACGAAATGAATATATTTTAAACCTAGCTGCGTCCATTGATGCGTTGTGGTGGATGT                  | 180 |
|               | ** **:* **:* **:* **:* **:* **:* **:* **:* **:* **:* **:* **:* **:* **:    |     |
| Human VEGF    | TGCAATGACGAGGGCCTGGAGTGTGTGCCACTGAGGAGTCCAACATCACCATGCAGATT                | 240 |
| Altered codon | TGTAACGATGAAGGTTTGGAAATGCGTTCCAACAGAAGAAAGCAATATACGATGCAAATC               | 240 |
|               | ** **:* **:* **:* **:* **:* **:* **:* **:* **:* **:* **:* **:* **:* **:    |     |
| Human VEGF    | ATGCGGATCAAACCTCACCAAGGCCAGCACATAGGAGAGATGAGCTTCCTACAGCACAAC               | 300 |
| Altered codon | ATGCGTATTAAGCCACATCAGGGTCAACATATGGTGAATGTCTTTTACAACATAAT                   | 300 |
|               | ***** ** **:* **:* **:* **:* **:* **:* **:* **:* **:* **:* **:* **:        |     |
| Human VEGF    | AAATGTGAATGCAGACCAAAGAAAGATAGA                                             | 330 |
| Altered codon | AAGTGCAGTGTGTCCTAAAAAGGACCGT                                               | 330 |
|               | **:* **:* **:* **:* **:* **:* **:* **:                                     |     |

**B Amino acid sequence alignment**(100% identical to human VEGF<sub>1-110</sub>)

|               |                                                              |     |
|---------------|--------------------------------------------------------------|-----|
| Wild-type     | APMAEGGGQNHHEVVKFMDVYQRSYCHPIETLVDIFQEYPDEIEYIFKPSCVPLMRCGGC | 60  |
| Altered codon | APMAEGGGQNHHEVVKFMDVYQRSYCHPIETLVDIFQEYPDEIEYIFKPSCVPLMRCGGC | 60  |
|               | *****                                                        |     |
| Wild-type     | CNDEGLECVPTESNITMQIMRIKPHQGQHIGEMSFLQHNKCECRPKKDR            | 110 |
| Altered codon | CNDEGLECVPTESNITMQIMRIKPHQGQHIGEMSFLQHNKCECRPKKDR            | 110 |
|               | *****                                                        |     |

Figure S1. **VEGF-Phage displays wild-type human VEGF protein but with artificial codons.** (A) The coding sequence with altered codons is 65.8 and 66.4% identical to human and mouse VEGF. (B) The encoded protein is 100% identical to human VEGF<sub>1-110</sub> (NCBI RefSeq accession no. NM\_001171623). Altered codons were optimized for bacteria expression and phage display. Asterisks indicate identical nucleotides or amino acids.

Table S1. List of known or putative endothelial ligands identified by comparative ligandomics

| CCDS ID   | Protein | Binding activity |        | Activity ratio | Comments and references                                                                                                        |
|-----------|---------|------------------|--------|----------------|--------------------------------------------------------------------------------------------------------------------------------|
|           |         | Control          | DR     |                |                                                                                                                                |
| CCDS23347 | Scg3    | 0                | 1,731  | 1,732          | Scg3 is verified as a DR-associated angiogenic factor in this study.                                                           |
| CCDS18810 | C1qb    | 0                | 837    | 838            | C1qb is the $\beta$ subunit of C1q, which is a known EC ligand (Kishore and Reid, 2000).                                       |
| CCDS28285 | App     | 1                | 206    | 103.5          | APP-derived $\beta$ -amyloid binds to RAGE (see Results).                                                                      |
| CCDS26200 | Jag2    | 0                | 92     | 93             | Jag2 is a ligand for Notch1, which is expressed on ECs (Kume, 2012).                                                           |
| CCDS20005 | Ptn     | 0                | 38     | 39             | Ptn is a known angiogenic factor involved in the pathogenesis of PDR (Zhu et al., 2015).                                       |
| CCDS15089 | Scg2    | 0                | 16     | 17             | Scg2 is a prohormone of secretoneurin, which is an angiogenic factor (Kirchmair et al., 2004).                                 |
| CCDS15806 | Notch1  | 0                | 16     | 17             | Notch1 is a ligand for Jagged1, which is expressed on ECs (Kume, 2012).                                                        |
| CCDS19483 | Sparcl1 | 1,003            | 5,336  | 5.3157         | Sparc modulates cell cycle progress in bovine aortic ECs (Funk and Sage, 1991).                                                |
| CCDS19983 | Podxl   | 3,877            | 9,349  | 2.4110         | Podxl2 is an L-selectin ligand that is expressed on ECs (Fieger et al., 2003).                                                 |
| CCDS16777 | Chgb    | 3,531            | 3,910  | 1.1073         | CgB, a member of the granin family, has an undefined role in EC regulation.                                                    |
| CCDS51013 | Notch2  | 2,114            | 2,264  | 1.0709         | Notch2 is a ligand for Jagged1, which is expressed on ECs (Kume, 2012).                                                        |
| CCDS28578 | Tulp1   | 55,252           | 49,334 | 0.8929         | Tulp1 is a ligand for TAM receptor tyrosine kinase family, similar to Gas6 (see Gas6 below; Caberoy et al., 2010; Lemke, 2013) |
| CCDS40232 | Gas6    | 8,876            | 7,139  | 0.8043         | Gas6 is a ligand for the TAM family of Tyro3, Axl, and Mer receptor tyrosine kinases to regulate ECs (Lemke, 2013).            |
| CCDS20912 | Apoe    | 90               | 61     | 0.6813         | Apolipoprotein E is a potent inhibitor of EC proliferation (Vogel et al., 1994).                                               |
| CCDS28390 | Plg     | 35               | 11     | 0.3333         | Plasminogen binds to EC surface actin to regulate fibrinolysis (Li et al., 1996).                                              |
| CCDS16766 | Prnp    | 220              | 47     | 0.2172         | Prion protein promotes angiogenesis (Turu et al., 2008).                                                                       |
| CCDS24864 | Ntn1    | 11               | 0      | 0.0833         | Netrin-1 inhibits EC apoptosis (Castets et al., 2009).                                                                         |
| CCDS17149 | Gnas    | 71               | 0      | 0.0139         | Gnas inhibits endothelial proliferation (Sakamoto et al., 2009).                                                               |
| CCDS18100 | Tpm2    | 12,226           | 165    | 0.0136         | Tpm2 is highly homologous to tropomyosin, which extrinsically inhibits angiogenesis (Doñate et al., 2004).                     |
| CCDS17457 | Hdgf    | 83               | 0      | 0.0119         | HDGF is an angiogenic factor (Oliver and Al-Awqati, 1998; LeBlanc et al., 2016).                                               |
| CCDS40011 | Hdgfrp3 | 11,140           | 48     | 0.0044         | Hdgfrp3 or HRP-3 is an angiogenic factor (LeBlanc et al., 2015).                                                               |
| CCDS16498 | Rcn1    | 23,107           | 71     | 0.0031         | Rcn1 binds to EC surface (Cooper et al., 2008).                                                                                |
| CCDS14820 | Sulf1   | 338              | 0      | 0.0030         | Sulfatase 1 remodels 6-O-sulfation on cell surface and inhibits VEGF signaling and angiogenesis (Lai et al., 2008).            |

Inclusion criteria: binding activity >10 (i.e., the activity of GFP-Phage) in diabetic or control retina.

## REFERENCES

- Caberoy, N.B., Y. Zhou, and W. Li. 2010. Tubby and tubby-like protein 1 are new MerTK ligands for phagocytosis. *EMBO J.* 29:3898–3910. <http://dx.doi.org/10.1038/emboj.2010.265>
- Castets, M., M.M. Coissieux, C. Delloye-Bourgeois, L. Bernard, J.G. Delcros, A. Bernet, V. Laudet, and P. Mehlen. 2009. Inhibition of endothelial cell apoptosis by netrin-1 during angiogenesis. *Dev. Cell.* 16:614–620. <http://dx.doi.org/10.1016/j.devcel.2009.02.006>
- Cooper, C.R., B. Graves, F. Pruitt, H. Chaib, J.E. Lynch, A.K. Cox, L. Sequeria, K.L. van Golen, A. Evans, K. Czymbek, et al. 2008. Novel surface expression of reticulocalbin 1 on bone endothelial cells and human prostate cancer cells is regulated by TNF- $\alpha$ . *J. Cell. Biochem.* 104:2298–2309. <http://dx.doi.org/10.1002/jcb.21785>
- Doñate, F., K. McCrae, D.E. Shaw, and A.P. Mazar. 2004. Extracellular tropomyosin: a novel common pathway target for anti-angiogenic therapy. *Curr. Cancer Drug Targets.* 4:543–553. <http://dx.doi.org/10.2174/1568009043332781>
- Fieger, C.B., C.M. Sasseti, and S.D. Rosen. 2003. Endoglycan, a member of the CD34 family, functions as an L-selectin ligand through modification with tyrosine sulfation and sialyl Lewis x. *J. Biol. Chem.* 278:27390–27398. <http://dx.doi.org/10.1074/jbc.M304204200>
- Funk, S.E., and E.H. Sage. 1991. The Ca<sup>2+</sup>-binding glycoprotein SPARC modulates cell cycle progression in bovine aortic endothelial cells. *Proc. Natl. Acad. Sci. USA.* 88:2648–2652. <http://dx.doi.org/10.1073/pnas.88.7.2648>
- Kirchmair, R., R. Gander, M. Egger, A. Hanley, M. Silver, A. Ritsch, T. Murayama, N. Kaneider, W. Sturm, M. Kearny, et al. 2004. The neuropeptide secretoneurin acts as a direct angiogenic cytokine in vitro and in vivo. *Circulation.* 109:777–783. <http://dx.doi.org/10.1161/01.CIR.0000112574.07422.C1>
- Kishore, U., and K.B. Reid. 2000. C1q: structure, function, and receptors. *Immunopharmacology.* 49:159–170. [http://dx.doi.org/10.1016/S0162-3109\(00\)80301-X](http://dx.doi.org/10.1016/S0162-3109(00)80301-X)
- Kume, T. 2012. Ligand-dependent Notch signaling in vascular formation. *Adv. Exp. Med. Biol.* 727:210–222. [http://dx.doi.org/10.1007/978-1-4614-0899-4\\_16](http://dx.doi.org/10.1007/978-1-4614-0899-4_16)
- Lai, J.P., D.S. Sandhu, A.M. Shire, and L.R. Roberts. 2008. The tumor suppressor function of human sulfatase 1 (SULF1) in carcinogenesis. *J. Gastrointest. Cancer.* 39:149–158. <http://dx.doi.org/10.1007/s12029-009-9058-y>
- LeBlanc, M.E., W. Wang, N.B. Caberoy, X. Chen, F. Guo, G. Alvarado, C. Shen, F. Wang, H. Wang, R. Chen, et al. 2015. Hepatoma-derived growth factor-related protein-3 is a novel angiogenic factor. *PLoS One.* 10:e0127904. <http://dx.doi.org/10.1371/journal.pone.0127904>
- LeBlanc, M.E., W. Wang, X. Chen, Y. Ji, A. Shakya, C. Shen, C. Zhang, V. Gonzalez, M. Brewer, J.X. Ma, et al. 2016. The regulatory role of hepatoma-derived growth factor as an angiogenic factor in the eye. *Mol. Vis.* 22:374–386.
- Lemke, G. 2013. Biology of the TAM receptors. *Cold Spring Harb. Perspect. Biol.* 5:a009076. <http://dx.doi.org/10.1101/cshperspect.a009076>

- Li, X.N., J.C. Koons, R.L. Benza, J.M. Parks, V.K. Varma, W.A. Bradley, S.H. Gianturco, K.B. Taylor, J.R. Grammer, E.M. Tabengwa, and F.M. Booyse. 1996. Hypertriglyceridemic VLDL decreases plasminogen binding to endothelial cells and surface-localized fibrinolysis. *Biochemistry*. 35:6080–6088. <http://dx.doi.org/10.1021/bi952032i>
- Oliver, J.A., and Q. Al-Awqati. 1998. An endothelial growth factor involved in rat renal development. *J. Clin. Invest.* 102:1208–1219. <http://dx.doi.org/10.1172/JCI785>
- Sakamoto, A., L.S. Weinstein, A. Plagge, M. Eckhaus, and G. Kelsey. 2009. GNAS haploinsufficiency leads to subcutaneous tumor formation with collagen and elastin deposition and calcification. *Endocr. Res.* 34:1–9. <http://dx.doi.org/10.1080/07435800902841280>
- Turu, M., M. Slevin, P. Ethirajan, A. Luque, A. Elsbali, A. Font, J. Gaffney, M. Cairols, P. Kumar, S. Kumar, and J. Krupinski. 2008. The normal cellular prion protein and its possible role in angiogenesis. *Front. Biosci.* 13:6491–6500. <http://dx.doi.org/10.2741/3169>
- Vogel, T., N.H. Guo, R. Guy, N. Drezlich, H.C. Krutzsch, D.A. Blake, A. Panet, and D.D. Roberts. 1994. Apolipoprotein E: a potent inhibitor of endothelial and tumor cell proliferation. *J. Cell. Biochem.* 54:299–308. <http://dx.doi.org/10.1002/jcb.240540306>
- Zhu, X., Y. Bai, W. Yu, C. Pan, E. Jin, D. Song, Q. Xu, Y. Yao, L. Huang, Y. Tao, et al. 2015. The effects of pleiotrophin in proliferative diabetic retinopathy. *PLoS One*. 10:e0115523. <http://dx.doi.org/10.1371/journal.pone.0115523>
